# Supplementary material for: TP53 mutations predict poor prognosis in diffuse large B-cell lymphoma: A single-center study
Source: Research Square preprint supplement (doi:10.21203/rs.3.rs-7797367/v1), 2025-10-28
Supplement: Supplementary file 1 [file 8e68fa287170f6eef6cb4cc1.xlsx]

## Sheet: Sheet1
Supplemental Table S2.The characteristics of the TP53 mutations
Patient ID	Mutation (bp)	mutation (as) codon	mutation type	VAF
152	c.1182A>G	p.*394Wext*9	Read through mutation	0.026
153	c.524G>A	p.R175H	Missense mutation	0.2706
154	c.645T>A	p.S215R	Missense mutation	0.655
155	c.140del	p.P47Rfs*76	Frameshift mutation	0.5027
156	c.743G>A c.376-1G>C c.725G>T	p.R248Q —— p.C242F	Missense mutation Splice site mutation Missense mutation	0.0219 0.018 0.0119
157	c.700_704del	p.Y234Lfs*4	Frameshift mutation	0.673
158	c.434T>A	p.L145Q	Missense mutation	0.598
159	c.658T>C	p.Y220H	Missense mutation	0.221
160	c.530C>T	p.P177L	Missense mutation	0.5217
161	c.524G>A	p.R175H	Missense mutation	0.7042
162	c.740A>T	p.N247I	Missense mutation	0.6823
163	c.710T>A	p.M237K	Missense mutation	0.667
164	c.470T>A	p.V157D	Missense mutation	0.5801
165	c.832C>A	p.P278T	Missense mutation	0.1886
166	c.863_864insGCCCGCCGGCGCACA GAGGAAGAGAA c.536A>G	p.N288Kfs*66 p.H179R	Frameshift mutation Missense mutation	0.2078 0.0274
167	c.578A>T	p.H193L	Missense mutation	0.5078
168	c.993+2T>C	——	Splice site mutation	0.301
169	c.743G>A	p.R248Q	Missense mutation	0.48
170	c.742C>T	p.R248W	Missense mutation	0.435
171	c.844C>T	p.R282W	Missense mutation	0.114
172	c.578A>T	p.H193L	Missense mutation	0.208
173	c.535C>G	p.H179D	Missense mutation	0.076
174	c.518T>C	p.V173A	Missense mutation	0.653
175	c.712T>A	p.C238S	Missense mutation	0.414
176	c.745A>G c.701A>C	p.R249G p.Y234S	Missense mutation Missense mutation	0.626 0.616
177	c.715A>G c.1031T>G c.337T＞G	p.N239D p.L344R p.F113v	Missense mutation Missense mutation Missense mutation	0.233 0.049 0.199
178	c.310C>T	p.Q104*	Nonsense mutation	0.009
179	c.402T>G c.337T>G	p.F134L p.F113V	Missense mutation Missense mutation	0.219 0.406
180	c.733G>A	p.G245S	Missense mutation	0.303
181	c.487T>C	p.Y163H	Missense mutation	0.238
182	c.818G>A c.824G>T	p.R273H p.C275F	Missense mutation Missense mutation	0.15 0.06
183	c.396G>C	p.K132N	Missense mutation	0.27
184	c.742C>T	p.R248W	Missense mutation	0.403
185	c.720T>G	p.S240R	Missense mutation	0.298
186	c.845G>C	p.R282P	Missense mutation	0.376
187	c.832C>A	p.P278T	Missense mutation	0.329
188	c.766A>C	p.T256P	Missense mutation	0.802
189	c.916C>T	p.R306*	Nonsense mutation	0.185
190	c.701A>C	p.Y234S	Missense mutation	0.342
191	c.375+1G>A c.613T>G	—— p.Y205D	Splice site mutation Missense mutation	0.016 0.013
192	c.733G>A	p.G245S	Missense mutation	0.072
193	c.743G>A 拷贝数缺失	p.R248Q	Missense mutation intragenic deletion	0.809 CN：1.0
194	c.844C>T	p.R282W	Missense mutation	0.12
195	c.818G>A	p.R273H	Missense mutation	0.616
196	c.272G>A	p.W91*	truncated mutation	0.499
197	c.527G>A	p.C176Y	Missense mutation	0.029
198	c.700T>C	p.Y234H	Missense mutation	0.262
199	c.721T>C	p.S241P	Missense mutation	0.256
200	c.428T>C	p.V143A	Missense mutation	0.486
201	c.380C>T	p.S127F	Missense mutation	0.667
202	c.376-2A>C	——	Splice site mutation	0.936
203	c.524G>A c.823T>G c.451C>T c.541C>T c.473G>A	p.R175H p.C275G p.P151S p.R181C p.R158H	Missense mutation Missense mutation Missense mutation Missense mutation Missense mutation	0.006 0.397 0.095 0.013 0.011
262	c.734G>A c.799C>T	p.G245D p.R267W	Missense mutation Missense mutation	0.4088 0.406
263	c.842A>G	p.D281G	Missense mutation	0.034
264	c.919+1G>A	——	Splice site mutation	0.4887
265	c.743G>A	p.R248Q	Missense mutation	0.007
266	c.559+2T>G	——	Splice site mutation	0.566
267	c.815T>G	p.V272G	Missense mutation	0.532
268	c.701A>G	p.Y234C	Missense mutation	0.149
269	c.818G>A c.542G>A	p.R273H p.R181H	Missense mutation Missense mutation	0.017 0.016
270	c.430C>T	p.Q144*	Nonsense mutation	0.782
271	c.374C>T	p.T125M	Missense mutation	0.872
272	c.743G>A	p.R248Q	Missense mutation	0.329
273	c.524G>A	p.R175H	Missense mutation	0.593
274	c.814G>A	p.V272M	Missense mutation	0.552
275	c.637C>T	p.R213*	Nonsense mutation	0.87
276	c.524G>A	p.R175H	Missense mutation	0.422
316	c.157-158dupTG	p.W53cfs*71	Frameshift mutation	0.66
317	c.785G＞T	p.G262v	Missense mutation	0.622
318	c.637C＞T c.915del	p.R213* p.K305Nfs*40	truncated mutation Frameshift mutation	0.173 0.158
319	c.770T＞C	p.L257P	Missense mutation	0.337
320	c.524G>A	p.R175H	Missense mutation	0.9561
321	c.524G>A	p.R175H	Missense mutation	0.4854
322	c.742C>T	p.R248W	Missense mutation	0.3034
323	c.524G>A	p.R175H	Missense mutation	0.0295
324	c.791T>G c.375+2T>G	p.L264R ——	Missense mutation Splice site mutation	0.6011 0.5356
386	c.376T>C	p.Y126H	Missense mutation	0.7013
387	c.796G>A	p.G266R	Missense mutation	0.2687
388	c.722C>T	p.S241F	Missense mutation	0.1792
389	c.659A>G	p.Y220C	Missense mutation	0.5966
390	c.706T>G	p.Y236D	Missense mutation	0.5812
391	c.743G>A c.638G>A	p.R248Q p.R213Q	Missense mutation Missense mutation	0.2327 0.2322
392	c.536A>G	p.H179R	Missense mutation	0.7992
393	c.641A>G	p.H214R	Missense mutation	0.4377
394	c.481G>A	p.A161T	Missense mutation	0.1914
395	c.537T>G c.764dup	p.H179Q p.T256Hfs*8	Missense mutation Frameshift mutation	0.3061 0.2373
396	c.216dupC	p.v73fs	Frameshift mutation	0.0399
397	c.400T>C	p.F134L	Missense mutation	0.2711
398	c.421T＞C	p.C141R	Missense mutation	0.1655
399	c.527G>A	p.C176Y	Missense mutation	0.3047
400	c437G＞A	p.W146*	Nonsense mutation	0.4438
401	c.799C＞T	p.R267W	Missense mutation	0.3691
402	c.484A＞T c.418A＞G	p.J162F P.T140A	Missense mutation Missense mutation	0.2957 0.29
403	c.272-281del c.833C＞T	p.w91Yfs*29 p.P278L	Frameshift mutation Missense mutation	0.514 0.239
404	c.742C＞T c.839G＞A	p.R248W P.R280K	Missense mutation Missense mutation	0.36 0.037
405	c.817C＞T	p.273C	Missense mutation	0.065
406	c.524G＞A 拷贝数缺失	p.R175H	Missense mutation intragenic deletion	0.77 CN：1.0
407	c.434T＞A	p.L145Q	Missense mutation	0.598
408	c.581T＞G	p.L194R	Missense mutation	0.3759
409	c.844C＞T	p.R282W	Missense mutation	0.131
410	c.817C＞T	p.273C	Missense mutation	0.1987
411	c.733G＞T	p.G245C	Missense mutation	0.7445
412	c.659A＞G	p.Y220C	Missense mutation	0.262
413	c.426del c.742C＞T	p.R158Afs*12 p.P248W	Frameshift mutation Missense mutation	0.0049 0.2624
414	c.451C＞T	p.P151S	Missense mutation	0.6043
415	c.731G＞A	p.G244D	Missense mutation	0.515
